# Supplementary material for: Spatial and Temporal Variations in PM10 Concentrations between 2010–2017 in South Africa
Source: MDPI journal article supplement (doi:10.3390/ijerph182413348), 2021-12-18
Supplement: s1 [file s1]

**Table S1.** The Pattern of PM<sub>10</sub> data availability across the sites for year 2010–2017.

| Province   | Site             | Site type   | 2010     | 2011     | 2012     | 2013     | 2014     | 2015     | 2016     | 2017     |
|------------|------------------|-------------|----------|----------|----------|----------|----------|----------|----------|----------|
| Gauteng    | Bodibeng         | Traffic     |          |          | 347(95%) | 328(90%) |          |          |          |          |
|            | Booyesen         | Residential |          |          | 326(89%) |          | 291(80%) |          |          |          |
|            | Ekandustria      | Industrial  |          |          |          | 261(72%) | 309(85%) |          |          |          |
|            | Elandsfontein    | Industrial  |          |          |          |          |          |          | 304(83%) | 325(89%) |
|            | Etwatwa          | Residential |          |          | 255(70%) |          |          |          |          |          |
|            | Germiston        | Residential |          | 293(80%) |          |          |          |          |          |          |
|            | Leandra          | Industrial  |          | 293(80%) | 275(75%) |          |          |          |          |          |
|            | Newtown          | Residential |          |          | 286(78%) |          |          |          |          |          |
|            | Olievenhoutbosch | Residential |          |          | 334(91%) |          |          |          |          |          |
|            | Orange Farm      | Residential | 263(72%) |          |          |          |          |          |          | 262(72%) |
|            | Randwater        | Industrial  |          |          |          | 305(84%) | 359(98%) | 300(82%) | 336(92%) | 278(76%) |
|            | Rosslyn          | Industrial  |          |          | 322(88%) | 348(95%) | 328(90%) |          |          |          |
|            | Tembisa          | Residential |          | 273(75%) |          |          |          |          |          |          |
|            | Thokoza          | Residential |          | 357(98%) |          |          |          |          |          |          |
|            | Watville         | Residential |          |          | 268(73%) |          |          |          |          |          |
| Mpumalanga | Bosjesspruit     | Industrial  |          |          |          |          |          |          |          | 332(91%) |
|            | Camden           | Industrial  |          |          |          | 349(96%) |          | 298(81%) |          | 302(83%) |
|            | Chicken Farm     | Industrial  |          |          |          |          |          |          |          | 349(95%) |
|            | Club             | Industrial  |          |          | 348(95%) | 351(96%) | 338(93%) |          | 319(87%) | 353(96%) |
|            | Embalenhle       | Industrial  |          |          | 296(81%) |          | 311(85%) |          | 333(91%) | 328(90%) |
|            | Ermelo           | Industrial  | 334(92%) | 347(94%) | 321(88%) | 301(82%) | 309(85%) | 279(76%) | 260(71%) |          |
|            | Grootvlei        | Industrial  |          | 359(98%) |          | 340(93%) |          |          |          |          |
|            | Hendrina         | Residential | 286(78%) | 284(78%) | 292(80%) |          |          | 303(83%) | 340(93%) |          |
|            | Komati           | Industrial  |          | 310(85%) | 313(86%) |          | 254(70%) | 310(85%) | 278(76%) | 314(86%) |
|            | Kriel village    | Industrial  |          |          |          |          |          |          |          | 301(82%) |
|            | Kwazamokuhle     | Residential |          |          |          |          |          |          |          | 290(79%) |
|            | Middleburg       | Industrial  | 299(82%) | 270(74%) | 346(95%) | 334(92%) | 306(84%) | 343(94%) | 299(82%) |          |
|            | Phola            | Industrial  |          |          |          | 308(84%) | 300(82%) |          | 343(94%) | 325(89%) |
|            | Secunda          | Industrial  | 317(87%) | 293(80%) | 264(72%) | 338(93%) |          |          |          |          |

|               |              |             |          |          |           |          |          |          |          |          |
|---------------|--------------|-------------|----------|----------|-----------|----------|----------|----------|----------|----------|
|               | Verykkop     | Industrial  |          |          |           | 328(90%) |          |          | 267(73%) | 331(90%) |
|               | Witbank      | Residential | 337(92%) |          |           | 331(91%) | 264(72%) | 293(80%) | 339(93%) |          |
| Western Cape  | Belville     | Industrial  |          |          | 301(82%)  | 348(95%) |          | 338(92%) | 305(83%) | 396(81%) |
|               | Foreshore    | Traffic     |          | 284(78%) | 325(89%)  | 344(94%) |          | 284(76%) | 354(97%) | 329(90%) |
|               | George       | Traffic     | 358(98%) |          |           | 259(71%) |          |          |          |          |
|               | Goodwood     | Residential |          | 346(95%) | 339(93%)  |          | 318(87%) | 286(78%) | 349(93%) |          |
|               | Stellenbosch | Industrial  |          |          | 361(99%)  | 284(78%) |          |          |          |          |
|               | Tableview    | Industrial  |          | 353(96%) | 269(73%)  | 288(79%) |          |          |          |          |
|               | Wallacedene  | Residential |          |          | 337(92%)  |          |          | 298(81%) | 334(91%) | 354(97%) |
| KwaZulu-Natal | Brackenham   | Residential |          | 363(99%) | 366(100%) |          |          | 360(98%) | 346(95%) | 332(91%) |
|               | CBD          | Traffic     |          | 355(97%) | 359(98%)  | 360(99%) |          | 350(96%) | 345(94%) | 350(96%) |
|               | City Hall    | Traffic     | 342(94%) |          |           |          |          |          |          |          |
|               | Esikhaweni   | Residential |          |          |           |          |          |          | 358(98%) | 326(89%) |
|               | Ganges       | Residential | 277(76%) | 344(94%) |           | 307(84%) | 292(80%) |          |          |          |
|               | Ferndale     | Residential | 330(90%) | 305(83%) | 256(70%)  |          |          |          |          |          |
